# Quantitative MRI and histopathology detect remyelination in inactive multiple sclerosis lesions

Vanessa Wiggermann<sup>1,2,3</sup>, Verena Endmayr<sup>4,5</sup>, Eneidino Hernández-Torres<sup>3,6</sup>, Romana Höftberger<sup>4</sup>, Gregor Kasprian<sup>7</sup>, Simon Hametner<sup>4,5,\*</sup>, and Alexander Rauscher<sup>1,2,8,9,\*</sup>

<sup>1</sup>Department of Physics and Astronomy, University of British Columbia, Canada; <sup>2</sup>Department of Pediatrics, University of British Columbia, Canada; <sup>3</sup>Danish Research Centre for Magnetic Resonance, Centre for Functional and Diagnostic Imaging and Research; Copenhagen University Hospital Amager & Hvidovre, Denmark; <sup>4</sup>Division of Neuropathology and Neurochemistry, Department of Neurology, Medical University of Vienna, Austria; <sup>5</sup>Centre for Brain Research, Medical University of Vienna, Austria; <sup>6</sup>Faculty of Medicine (Division Neurology), University of British Columbia, Canada; <sup>7</sup>Department of Biomedical Imaging and Image-Guided Therapy, Medical University of Vienna, Austria; <sup>8</sup>Department of Radiology, University of British Columbia, Canada; <sup>9</sup>BC Children's Hospital Research Institute, University of British Columbia, Canada; \*equal contribution

This work is submitted for peer-review to Brain Pathology.

**Magnetic resonance imaging (MRI) of focal or diffuse myelin damage or remyelination may provide important insights into disease progression and potential treatment efficacy in multiple sclerosis (MS). We performed post-mortem MRI and histopathological myelin measurements in seven progressive MS cases to evaluate the ability of three myelin-sensitive MRI scans to distinguish different stages of MS pathology, particularly chronic demyelinated and remyelinated lesions. At 3 Tesla, we acquired two different myelin water imaging (MWI) scans and magnetization transfer ratio (MTR) data. Histopathology included histochemical stainings for myelin phospholipids (LFB) and iron as well as immunohistochemistry for myelin proteolipid protein (PLP), CD68 (phagocytosing microglia/macrophages) and BCAS1 (remyelinating oligodendrocytes). Mixed-effects modelling determined which histopathological metric best predicted MWF and MTR in normal appearing and diffusely abnormal white matter, slowly expanding, inactive, remyelinated and ischemic lesions. Both MWI measures correlated well with each other and histology across regions, reflecting the different stages of MS pathology. MTR data showed a considerable influence of components other than myelin and a strong dependency on tissue storage duration. Both MRI and histology revealed increased myelin densities in inactive compared with slowly expanding lesions. Chronic inactive lesions harboured single scattered myelin fibres indicative of low-level remyelination. Mixed-effects modelling showed that smaller differences between white matter areas were linked to PLP densities and only to a smaller extent confounded by iron. MWI reflects differences in myelin lipids and proteins across all levels of myelin densities encountered in MS, including low-level remyelination in chronic inactive lesions.**

**Keywords:** remyelination | histopathology | myelin protein | MRI | iron

Multiple sclerosis (MS) is a chronic inflammatory disease of the central nervous system (CNS), leading to the formation of focal areas of destruction, phagocytosis and digestion of CNS myelin sheaths. Remyelination may follow demyelination (1), but the proportion of remyelinated MS lesions varies greatly between individuals at autopsy (2). Fostering remyelination reduces axonal loss and may thus curtail MS progression (3), rendering it an important target of new therapeutic trials. Non-invasive myelin quantification by means of magnetic resonance imaging (MRI) will be a key component of such trials (4). Among the many MRI techniques for assessing myelin in vivo, multi-echo spin-echo T<sub>2</sub> MWI (5–9) is considered one of the most myelin-specific (10–13) as it separately

quantifies the MRI signal from water protons in the myelin phospholipid bilayers. The mobility of these protons is highly restricted, resulting in a faster T<sub>2</sub> decay than water protons within axons, cell bodies and the extracellular space. The ratio of the short T<sub>2</sub> signal component over the total water signal, termed myelin water fraction (MWF), is considered a surrogate measure of myelin content (5, 14).

Here, we compared three MRI-based myelin scans for the quantitation of myelin in seven progressive MS cases. MS lesions in various stages of de- and remyelination, normal appearing and diffusely abnormal white matter were included and characterized with histopathology and MRI-based myelin measures: 3D multi-echo T<sub>2</sub> gradient- and spin-echo (GraSE) MWI (15), 3D multi-echo spin-echo MWI (16, 17) and 3D MTR (18). Histopathology included Luxol Fast Blue (LFB) staining for phospholipids and diaminobenzidine-enhanced Turnbull blue (TBB) staining for iron. In addition, immunohistochemical stainings for proteolipid protein (PLP), one of the major myelin proteins, CD68 for phagocytosing microglia/macrophages and BCAS1 staining for remyelinating oligodendrocytes were obtained (19).

## Materials and Methods

**Post-mortem samples.** Seven *post-mortem* brains of progressive MS patients (six with secondary-progressive MS, one with primary-progressive MS) were included. Whole brains had been fixed in 4% neutral-buffered formalin for three to four weeks at room temperature. Four cases from the archive at the Neuroimmunology department of the Center for Brain Research, Medical University of Vienna (MUV), Austria, had been fixed in formalin and stored for 9 to 14 years in 1% formalin diluted in phosphate-buffered saline (PBS) at 4° C. Three cases derived from the Division of Neuropathology and Neurochemistry, MUV, Austria, were fixed and stored in formalin for up to 1 year. Basic epidemiological and clinical data are provided in Table 1.

**MRI data acquisition.** For Cases 6 and 7, whole brains were available for MRI. Of all other cases, smaller tissue slabs were scanned. Their diameters ranged from 21.1 to 110.2 mm and their thickness from 4.2 to 23.8 mm. Scanning was performed on two identical 3T MRI systems (Philips Achieva, Best, The

The authors have no conflicts of interest to declare relevant to this work. RH has received speaker honoraria from Euroimmun, Novartis and Biogen. VW is a board member of NeuroImage: Clinical.

\*Corresponding author. E-mail: [vanessaw@drcmr.dk](mailto:vanessaw@drcmr.dk)

**Table 1. Demographic information of the *post-mortem* brain samples, including approximate time since fixation in years.** To preserve anonymity, only age ranges are provided. Causes of death were unrelated to MS and included myocardial infarction, cardiovascular death and pancreatic cancer. Storage time refers to storage time in 1% paraformaldehyde / phosphate-buffered saline (SPMS: secondary progressive MS; PPMS: primary progressive MS; M: male; F: female)

|        | Age<br>w/i [yrs] | Sex | Clinical<br>course | Disease<br>dur. [yrs] | Storage<br>[yrs] |
|--------|------------------|-----|--------------------|-----------------------|------------------|
| Case 1 | 31-35            | M   | SPMS               | 10.0                  | 10.0             |
| Case 2 | 41-45            | M   | SPMS               | 11.4                  | 14.0             |
| Case 3 | 46-50            | F   | SPMS               | 37.0                  | 9.0              |
| Case 4 | 66-70            | M   | PPMS               | 7.3                   | 12.0             |
| Case 5 | 61-65            | F   | SPMS               | 33                    | < 1              |
| Case 6 | 51-55            | M   | SPMS               | 24                    | < 1              |
| Case 7 | 56-60            | F   | SPMS               | 34                    | < 1              |

54 Netherlands) in 2015-2016; four cases at the University of  
 55 British Columbia (UBC) and three cases at MUV. For all  
 56 samples, we acquired 32-echo 3D-GraSE  $T_2$  data for MWI  
 57 ( $TE/\Delta TE/TR = 10/10/719$  ms, reconstructed  $0.9 \times 0.9 \times$   
 58  $1.5 \text{ mm}^3$ ) (15). 3D-MTR images were acquired for all cases,  
 59 except Case 6 ( $TE/TR = 3.7/84.6$  ms, reconstructed  $0.9 \times$   
 60  $0.9 \times 2 \text{ mm}^3$ , flip angle(*exc/mtc*) =  $18^\circ/520^\circ$ ,  $\Delta f = 1.1$  kHz  
 61 below Larmor frequency). Data acquisition at UBC (Cases  
 62 1-4) also included 3D multi-echo spin-echo imaging (CPMG  
 63 – Carr-Purcell Meiboom-Gill,  $TE/\Delta TE/TR = 10/10/1200$   
 64 ms, reconstructed  $0.9 \times 0.9 \times 3 \text{ mm}^3$ ) (16, 17).  $T_2$ -weighted  
 65 images were acquired for registration purposes at  $TE/TR =$   
 66  $100 \text{ ms}/2500 \text{ ms}$ ,  $0.66 \times 0.66 \times 0.7 \text{ mm}^3$ . Acquisition parameters  
 67 were minimally adapted to adjust for the different sample sizes.  
 68 Only for Case 5, the 3D-GraSE sequence was substantially  
 69 changed necessitated by the much larger field-of-view. The  
 70 study and tissue scanning protocol were approved by the  
 71 clinical research ethics boards of both sites (UBC: H15-011,  
 72 MUV: EK Nr. 1491-2017).

73 **MRI data processing.** Data processing and analysis was imple-  
 74 mented in MATLAB 2017b. MWF was computed as previously  
 75 described (5, 20). Briefly,  $T_2$  distributions were obtained us-  
 76 ing the extended phase graph algorithm (21) and regularized,  
 77 non-negative least squares fitting.  $T_2$  distributions of all tissue  
 78 samples in multiple white matter (WM) regions were con-  
 79 sulted. Subsequently, the MWF was determined as the  $T_2$   
 80 signal fraction between 12 – 25 ms relative to all water (intra-  
 81 /extracellular water  $T_2$  range: 25 – 100 ms). MTR maps were  
 82 calculated as the ratio of the signal difference between the on-  
 83 resonance and off-resonance scan relative to the off-resonance  
 84 scan (18).

85 **Tissue Preparation.** After scanning, whole-brain cases were  
 86 cut into 1 cm thick coronal double-hemispheric slices. All  
 87 other tissue slabs were directly processed for histology. Sam-  
 88 ples were dehydrated (Miles Scientific™ autotechnicon device)  
 89 and embedded in paraffin. Paraffin blocks were cut into  $10 \mu\text{m}$   
 90 thick serial sections with a tetrandier microtome (R. Jung AG,  
 91 Heidelberg). Sections were stained for hematoxylin and eosin  
 92 (H&E) to assess general pathology, Luxol fast blue – periodic-  
 93 acid Schiff (LFB-PAS) to visualize myelin and classify MS  
 94 lesions, and diaminobenzidine (DAB)-enhanced TBB to detect

iron (22). Iron is stored in myelin-forming oligodendrocytes,  
 but also in myelin itself and is a known confounder to MWI and  
 MTR (23–25). Immunohistochemistry for mouse monoclonal  
 PLP (Serotec, MCA839G, dilution 1:1000) was performed by  
 heat-steaming sections in ethylenediaminetetraacetic acid  
 (EDTA, pH 9.0, 1h) for antigen retrieval. Unspecific anti-  
 body binding was blocked by incubation in 10% fetal calf  
 serum (FCS) diluted in Dako wash buffer (DAKO, 20 min,  
 room temperature). After overnight-incubation at  $4^\circ \text{C}$ , a  
 biotinylated donkey anti-mouse secondary antibody was ap-  
 plied. Sections were then incubated with avidin-conjugated  
 horseradish peroxidase (Sigma Aldrich, dilution 1:500 in 10%  
 FCS/DAKO, 1h, room temperature) and developed with the  
 chromogen DAB, producing a brown PLP signal. For CD68  
 (Dako, M0814, Clone KP1, dilution 1:2000) and BCAS1 (Santa  
 Cruz, sc-136342, dilution 1:4000), sections were steamed in  
 TRIS buffer (pH 6.0, 1h). Primary antibodies were applied  
 overnight at  $4^\circ \text{C}$ . After application of an appropriate biotin-  
 ylated secondary anti-mouse antibody, the Envision system was  
 used according to the manufacturer’s protocol. Stainings were  
 visualized by DAB development for  $2 \times 5$  minutes, producing a  
 brown reaction product. Stainings were scanned using an Agfa  
 Duoscan® device under standardized brightness conditions, at  
 800 pixels/inch, and saved as RGB TIFF.

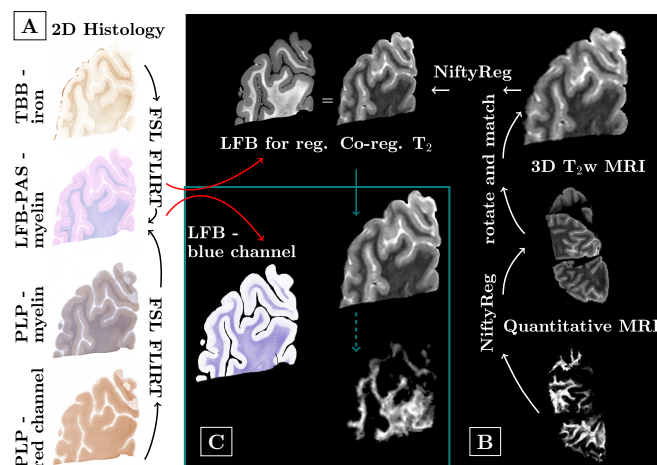

**Fig. 1. Overview of processing pipeline. Differently stained histology sections were aligned with 2D FSL FLIRT.** To register all quantitative images, first a pipeline was established based on the 3D  $T_2$  scans, which were reoriented and resliced to match the histology. Registration between histology and MRI was performed using NiftyReg. Quantitative maps were then registered to the 3D  $T_2$  and the already established pipeline and registration matrices were applied.

**MRI-histology registration.** Figure 1 provides an overview of the MRI-histology registration procedure. Histology images were downsampled by a factor of two along both dimensions. LFB-PAS and PLP sections were colour-deconvolved using ImageJ version 1.43r (A.C. Ruifrok, NIH, Bethesda, MD, USA) to extract the blue channel, i.e. the LFB dye, of the LFB-PAS double-stained sections and the red channel, i.e. the DAB dye, of the hematoxylin-counterstained PLP sections. Because mounting of the sections on glass slides can introduce small 2D distortions, TBB and PLP were registered to the LFB section using 2D FSL FLIRT (26) (default parameters, five degrees of freedom). Initial registrations utilized sections prior to colour

131 deconvolution. Registration matrices were then applied to the  
132 lower-contrast, colour-deconvolved sections.

133 Within-MRI and histology-MRI registrations were per-  
134 formed using NiftyReg's aladin and f3d (default parameters)  
135 (27). T<sub>2</sub>-weighted MRIs were reoriented and sliced to match  
136 the histology section plane. To approximate the resolutions,  
137 reformatted images were up-sampled and histology images  
138 further down-sampled. Manual corrections, such as removal of  
139 tissue from unrelated sections, were performed for all cases in-  
140 dividually. Lastly, registered images were up-sampled to match  
141 the histology resolution. MRI data were sent to the histology  
142 space to avoid altering the regions-of-interest (ROIs), which  
143 were manually defined on the histology sections in FSLview.  
144 For the quantitative analysis, all 3D MRIs were registered to  
145 the T<sub>2</sub>-weighted images. Linear registrations were performed  
146 using individual echoes of the quantitative data (default pa-  
147 rameters). Subsequently, quantitative maps were transformed  
148 using NiftyReg's resample and were then subjected to the same  
149 pipeline as the T<sub>2</sub>-weighted images, i.e. volume re-orientation,  
150 slice selection and mapping to histology.

151 **Manual ROI definition.** ROIs were identified by microscopical  
152 inspection of H&E, LFB-PAS and PLP-stained slices using  
153 an Olympus BX50<sup>®</sup> microscope by two readers (VE, SH).  
154 Non-lesional normal appearing white matter (NAWM) was  
155 identified by well-preserved myelin in both LFB-PAS and  
156 PLP stainings. Diffusely abnormal white matter (DAWM)  
157 had ill-defined areas of LFB-PAS but no PLP reduction (28).  
158 Lesional WM included slowly expanding lesions (SEL), in-  
159 active lesions (InaL), shadow plaques (SdP) and ischemic  
160 lesions (IsL). Slowly expanding lesions had few LFB- and PLP-  
161 positive myelin degradation products within phagocytes at  
162 the lesion borders, while their centers were almost completely  
163 devoid of myelin in the PLP and LFB stainings. Macrophages  
164 in the slowly expanding lesion cores were LFB-negative and  
165 frequently harbored PAS-positive material. Inactive lesions  
166 occasionally showed PAS-positive macrophages, but no LFB-  
167 or PLP-positive myelin remnants within phagocytes anywhere.  
168 Shadow plaques displayed sharp borders of LFB-myelin reduc-  
169 tion, resulting from thinner remyelinating sheaths, and evenly  
170 distributed intact myelin throughout the plaque. We further  
171 encountered circumscribed lesions of myelin reduction but not  
172 depletion, similar to shadow plaques. However, these lesions  
173 had ill-defined borders and increased LFB-intensity around  
174 blood vessels traversing the lesions, i.e. a non-homogenous  
175 LFB-intensity reduction within the lesion. Their coarse tex-  
176 ture indicated pronounced widening of the extracellular spaces.  
177 These were labeled ischemic lesions. ROIs were manually out-  
178 lined on the LFB-PAS images. Anatomical and pathological  
179 boundaries were generously spared. To account for small differ-  
180 ences in slice matching and imperfect registration, the masks  
181 were adapted to optimally match the TBB and PLP scans and  
182 the registered T<sub>2</sub>-weighted MRI. CD68 stainings were qualita-  
183 tively evaluated for the distinction between slowly expanding  
184 (CD68 rim of microglia/macrophages present) and inactive (no  
185 CD68 rim present) lesions. BCAS1 stainings were evaluated  
186 with a counting grid in NAWM, DAWM and centers of slowly  
187 expanding, inactive and remyelinated lesions. The evaluated  
188 area covered 1 mm<sup>2</sup>, i.e. four neighboring visual fields at 20x  
189 magnification. Only clearly and strongly BCAS1-positive glial  
190 cells were counted.

**Data and statistical analysis.** ROIs were automatically  
matched using their voxel location and the classification  
assigned to each ROI. We applied bwconncomp, a region-  
detection algorithm in MATLAB, to correlate histological and  
MRI values in all ROIs. Gray-scale medians for each ROI were  
calculated in all MRI and histological images, representative  
of each ROI's myelin state.

Differences between slowly expanding and inactive lesions  
were assessed by a two-sided rank sum test (5% significance  
level). Correlations were performed on a per-case basis to  
suppress the influence of varying post-mortem delays, forma-  
lin fixation and storage times. Weighted average within-case  
slopes, intercepts and p-values were obtained, with weights  
represented by the variance of the individual within-section  
slopes, intercepts and correlation coefficients, respectively. Av-  
erage correlation coefficients were determined by transforming  
the r-values using Fisher's z-transformation and subsequently  
computing the hyperbolic tangent of the average of the trans-  
formed r-values. Finally, a linear mixed effects regression  
model was used in R to determine the standardized correlation  
coefficients as a measure of relative importance of LFB, PLP,  
TBB and storage time in predicting MWF and MTR (lm.beta  
package) (29). The data offset was modelled with two random  
factors that accounted for inter- and intra-subject variability.  
Collinearity between predictors was evaluated using the vif  
function (30). BCAS1 count differences were tested using  
an ANCOVA. ROI was used as fixed factor and slice ID as  
random factor to correct for multiple data points derived from  
the same cases.

## Results

Matching MRI and histology data, we obtained 27 section  
planes from the seven MS cases. GraSE MWF data of Case 5  
were excluded due to unexpectedly low contrast, presumably  
related to changes in acquisition. One section from Case 6  
was also excluded due to unreliable GraSE MWF signal. All  
cases showed pathological alterations typical of progressive MS,  
including DAWM, slowly expanding and inactive lesions as  
well as remyelinated shadow plaques. Classical active lesions  
were not observed. Major confounding pathology was noted  
in Case 7, which harboured ischemic lesions together with  
severely atherosclerotic large meningeal arteries. Only lesions  
of either clear ischemic or MS origin were analyzed. In total,  
610 ROIs were outlined (median size 5.69 mm<sup>2</sup>, range: 0.14  
mm<sup>2</sup>– 32.09 mm<sup>2</sup>). Figure 2 exemplifies matched MRI and  
histology with corresponding ROIs from four MS cases.

Histological stainings of one section of Case 7 are exem-  
plified in Figure 3. NAWM was predominantly found in sub-  
cortical WM areas, since the progressive MS cases displayed  
typical widespread diffuse myelin injury in deep WM areas  
(Fig. 3g, black arrows). Inactive, but not slowly expanding le-  
sions, harboured scattered thin myelin sheaths in their centers  
(compare Fig. 3i & Fig. 3j). BCAS1 staining (Fig. 3h) showed  
the highest cell densities in peri-plaque WM close to the rim of  
slowly expanding lesions (Fig. 3k), but on average hardly any  
positive cells in the lesion cores. A subset of inactive lesions,  
however, displayed clustered positive cells in the lesion center  
(Fig. 3l). Upon morphological evaluation of BCAS1+ cells, we  
noted that one portion of positive cells



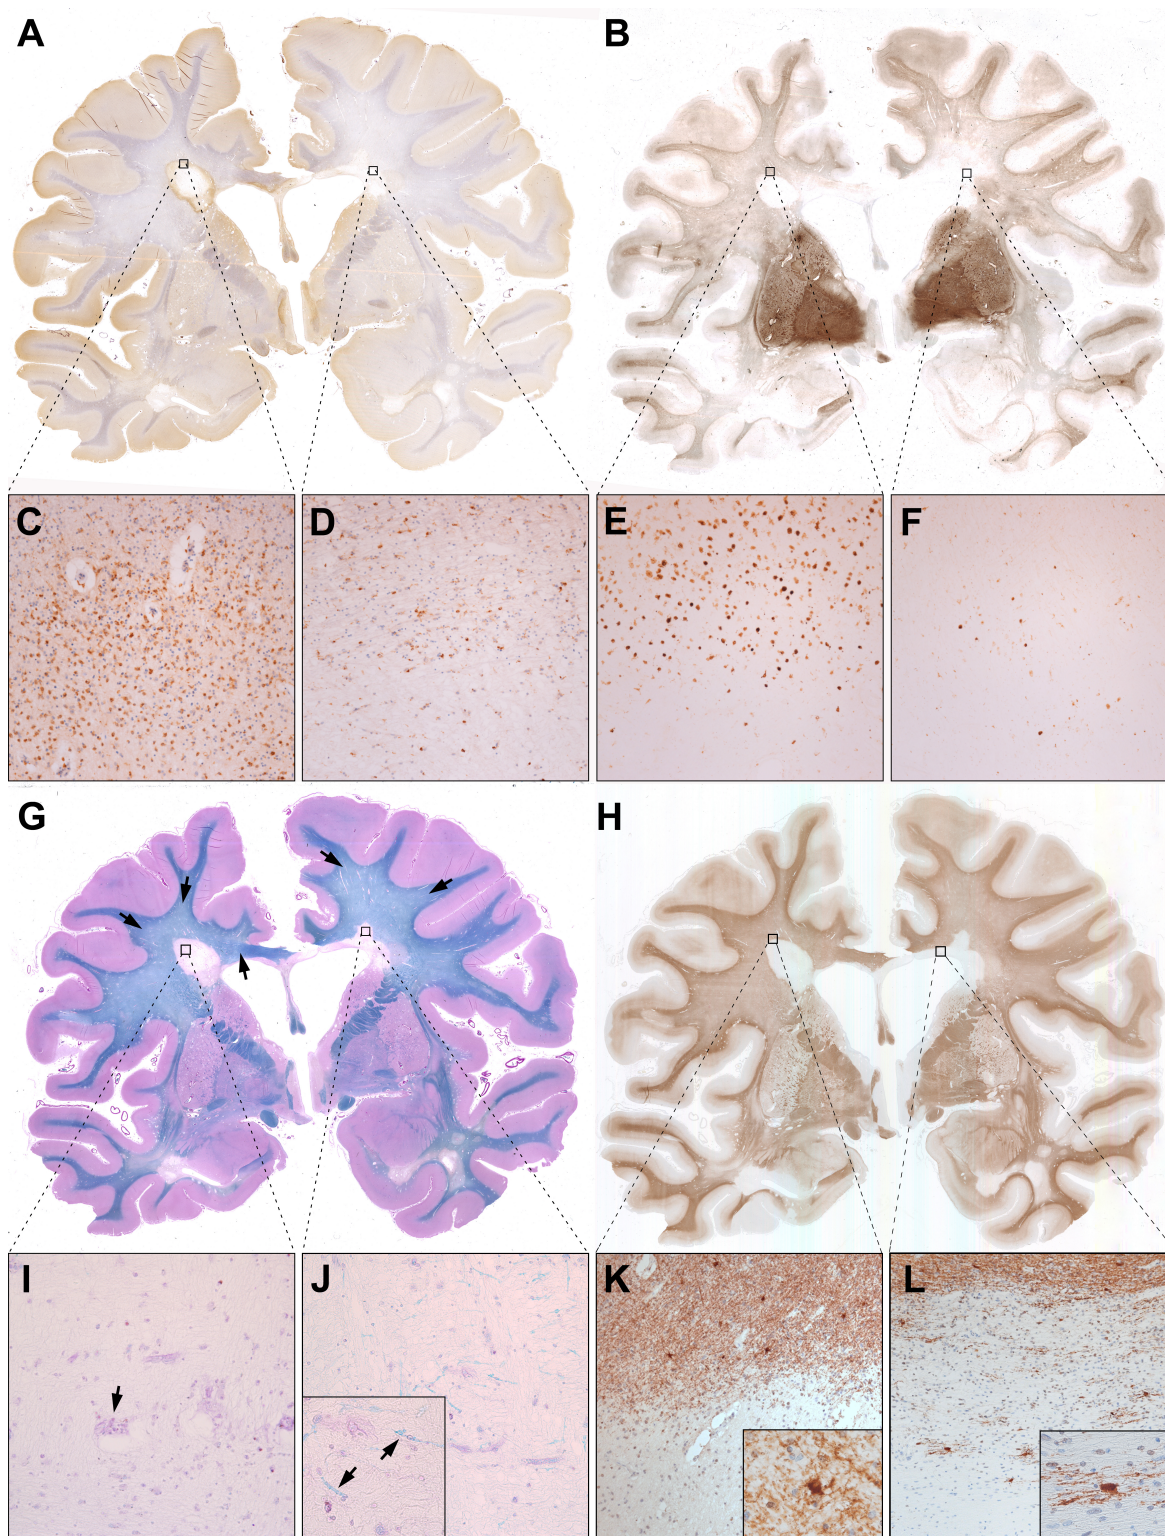

**Fig. 3. Histological sections of a double-hemispheric coronal slice level of Case 7.** (A) CD68 immunohistochemistry revealed accumulated activated microglia and macrophages at the edge of a slowly expanding periventricular lesion (left black square, enlarged in C), but not at the inactive periventricular lesion edge (right black square, enlarged in D). (B) Similarly, TBB staining showed iron accumulation at the slowly expanding (E), but not at the inactive lesions edge (F). Both lesions had iron loss in their centers. In WM, iron staining was highest subcortically, gradually decreased in DAWM and towards lesions, and was lowest within lesion centers. (G) LFB-PAS myelin staining visually distinguished areas of NAWM (mainly subcortically and in the capsula interna), DAWM and MS lesions. Black arrows indicate the ill-defined DAWM, characterized by reduced myelin intensity. Both periventricular MS lesions (enlarged in I and J) showed myelin loss. Notably, scattered thin myelin sheaths were present within some inactive lesion centers (J, high magnification inset with arrows), but never in slowly expanding lesions (I). Occasional macrophages with PAS-positive cytoplasmic inclusions, indicative of remote demyelination, were found. (H) BCAS1 immunohistochemistry revealed moderate immunoreactivity in myelin, rendering exquisite histological myelin contrast. Strongly BCAS1-positive glial cells without processes and dystrophic morphology accumulated in areas of WM damage, such as DAWM (see quantitative data) and WM abutting slowly expanding lesion edges (K). Process-bearing actively remyelinating oligodendrocytes could be found exclusively in few inactive lesions (L) and shadow plaques.



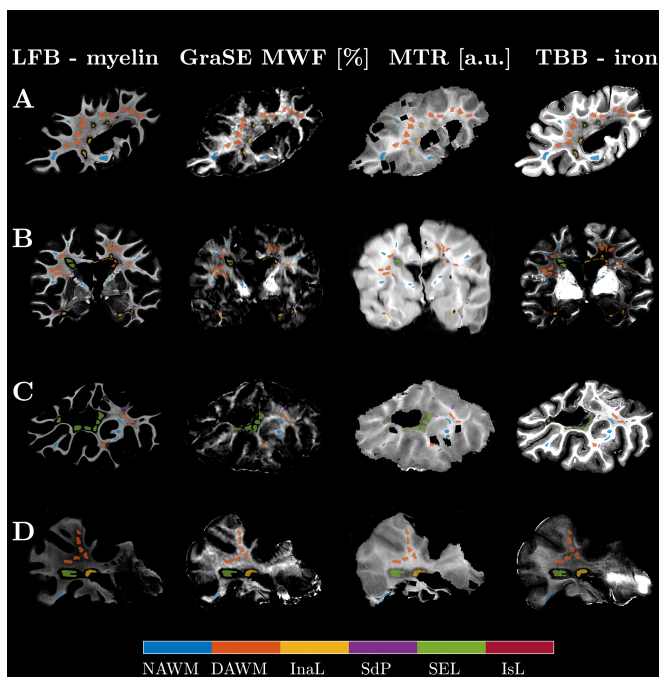

**Fig. 2. Qualitative comparison of the histology and co-registered MRI data for four sections from four cases** (A: Case 4, B: Case 7, C: Case 1, D: Case 2). The histological images were contrast-inverted to visually match the MRI contrasts so that lower intensities represent lower myelin or iron concentrations. Co-registration achieved good matching of the MRI to the LFB stains, which were chosen as histology reference. ROIs were centered in representative regions, yielding good local correspondence of ROIs on visual inspection. The ROIs were drawn with a gap to avoid partial volume effects at anatomical or lesion borders. (Acronyms: normal appearing WM (NAWM); diffusely abnormal WM (DAWM); inactive lesions (InaL); shadow plaques (SdP); slowly expanding lesions (SEL); ischemic lesions (IsL))

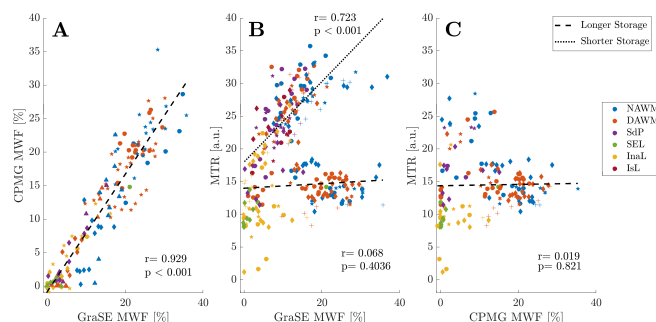

**Fig. 4. Correlation of all MRI metrics.** Both MWF estimates showed excellent agreement with a minimal intercept (A), whereas correlations between MWF and MTR depended on storage times (B,C). Correlations between MWF and MTR were significant in tissues with storage times of < 1 year (dotted line) and were non-significant for tissues with extended storage time > 9 years (dashed line). Note that CPMG data were only available for samples with extended storage time (C). Symbols indicate different cases; colors distinguish different tissue types. (Acronyms: normal appearing WM (NAWM); diffusely abnormal WM (DAWM); inactive lesions (InaL); shadow plaques (SdP); slowly expanding lesions (SEL); ischemic lesions (IsL))

gression intercepts in all correlations with MTR were different from zero. In cases stored < 1 year, the intercept for GraSE MWF and MTR was 19.3 a.u.. In cases with extended storage, the intercepts were 14.2 a.u. and 14.5 a.u., when comparing GraSE MWF and CPMG MWF with MTR, respectively.

### Histological and MRI-based myelin measurements in different ROIs

Figure 5 displays the stratification of histological optical densities and MRI data according to ROI. WM LFB (Fig. 5a) and PLP (Fig. 5c) optical densities were highest in NAWM, followed by DAWM, shadow plaques and inactive lesions, and were lowest in slowly expanding lesions. LFB and PLP densities in ischemic lesions resembled those of shadow plaques. In contrast to LFB, PLP hardly differed between NAWM and DAWM. Iron was lower in DAWM compared to NAWM, and markedly depleted in slowly expanding and inactive lesions. In shadow plaques, iron densities ranged between the densities of DAWM and demyelinated lesions. Few high NAWM iron densities were derived from Case 1.

Of all MRI metrics (Figs. 5b and 5d, CPMG data not shown), relative differences in GraSE MWF between ROIs most closely matched the LFB and PLP intensity distributions (Figs. 5a and 5c). All myelin MRI metrics were reduced in DAWM compared to NAWM, though less so than LFB. MWF was lower in all WM lesions than in NAWM or DAWM. In shadow plaques and ischemic lesions, MWF was between slowly expanding lesions and DAWM, best reflecting LFB and PLP relations. By contrast, MTR in shadow plaques exceeded NAWM MTR. All three MRI measures yielded higher values in inactive compared to slowly expanding lesions, sensitively reflecting histological myelin data. LFB ( $p < 0.001$ ), GraSE MWF ( $p = 0.016$ ) and MTR ( $p < 0.001$ ) were all significantly higher in inactive compared to slowly expanding lesions, also after Bonferroni correction. BCAS1 counts, indicative of the number of actively remyelinating oligodendrocytes, were generally in line with the observations from LFB and MWF. The number of BCAS1+ cells in lesion areas was generally lower than counts in NAWM and DAWM. Slowly expanding lesions were found to have, on average, slightly lower BCAS1+ counts than inactive lesions and shadow plaques, although the differ-

had strong cytoplasmic immunoreactivity, and either absent or very short and dystrophic-appearing processes. This type of BCAS1+ cell morphology was found in NAWM, DAWM and was most prominent in periplaque WM close to slowly expanding lesion (Fig. 3k). Conversely, BCAS1+ cells in inactive and remyelinated lesion cores had multiple, partly parallel processes (Fig. 3l). Ischemic lesions were reminiscent of shadow plaques regarding their myelin densities but differed morphologically. Shadow plaques were characterized by a sharp border and homogeneously thin myelin sheaths in the plaque area. By contrast, ischemic lesions showed a gradient of myelin intensity, including ill-defined borders, as well as a coarse lesion tissue texture with loss of whole myelin fibers, but preservation of normal myelin sheath thickness in the remaining fibers.

**Comparison of MRI-based myelin estimates.** Fig. 4a displays the regression between GraSE and CPMG MWF ( $R^2 = 0.862$ , slope = 0.858 %/%, intercept = -0.42% MWF), which demonstrates excellent agreement of these two myelin water scans. However, the regression of CPMG MWF and MTR was insignificant (Fig. 4c,  $R^2 < 0.01$ ). Note that CPMG data were only acquired in samples with storage times longer than 9 years. The MTR – GraSE MWF relationship was modelled by two different, storage time dependent regression lines (Fig. 4b). GraSE MWF and MTR correlated significantly in tissue blocks with storage times of < 1 year, ( $R^2 = 0.436$ ), but not in those with extended storage times ( $R^2 < 0.01$ ). Notably, the re-

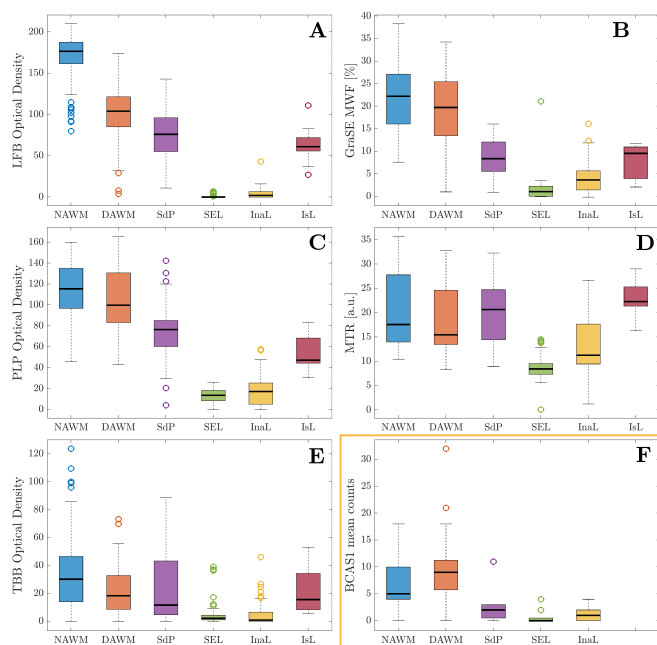

**Fig. 5. Comparison of quantitative MRI values and optical densities across regions of interest.** Panels on the left display the histological density measurements (LFB (A), PLP (C), TBB (E)), panels on the right the MRI myelin measurements (GraSE MWF (B), MTR (D)). Panel F displays the separately obtained BCAS1 counts. LFB and PLP differences between ROIs, including in lesions, were well reflected in both MWF measurements. By contrast, MTR changes appeared more closely linked to the TBB staining intensities, and MTR values overlapped between regions. Note that the data collection for CPMG and MTR were incomplete, thus not all ROIs are present in the MTR plot. (Acronyms: normal appearing WM (NAWM); diffusely abnormal WM (DAWM); inactive lesions (InaL); shadow plaques (SdP); slowly expanding lesions (SEL); ischemic lesions (IsL))

related to DAWM GraSE MWF and MTR. Similar to NAWM, MRI myelin values in shadow plaques were predicted by PLP, storage time and in part LFB. In line with the above-described differences between inactive and slowly expanding lesions, the mixed effects model revealed some association between LFB and MWF in inactive, but not in slowly expanding lesions. The latter only showed a dependency for MTR on LFB. Standardized regression coefficients, i.e. the amount of change that a variation in each of the predictor variable yields in the MRI-measured myelin values, are provided together with the p-values in [Table 2](#).

## Discussion

We assessed the ability of three myelin-sensitive MRI techniques to differentiate various degrees of myelin damage, recovery and lesional activity in a larger sample of progressive MS cases. Using histochemical and immunohistochemical stainings for myelin, we showed low levels of myelin in completely inactive lesions. We suggest that this myelin signal may represent remyelination occurring in chronic MS lesions without microglia or iron rims. These low myelin levels were conspicuous in the high-magnification of the histological stainings and captured by all investigated myelin-sensitive MRI techniques and in part corroborated by BCAS1 stainings. Importantly, our data showed that BCAS1-positivity is not exclusively a marker for remyelinating oligodendrocytes, but that it also marks degenerating glial cells in DAWM and in the vicinity of the chronic active lesion edges. Detecting and following subtle remyelination in vivo in chronic lesions provides an additional avenue for assessing repair in MS and may be a relevant consideration for trials of remyelinating therapies, which typically are believed to be most efficacious in younger MS lesions.

**Comparison of MWF, MTR and histopathological metrics.** The excellent agreement of CPMG and GraSE MWF ( $R^2 = 0.862$ ) corroborates in vivo comparisons (15). We attributed the two different relationships of MWF with MTR to storage time. MTR is known to decrease with formaldehyde fixation (31), but longer-term pH changes may also affect MTR similar to other off-resonance techniques (32). NAWM and DAWM showed the most pronounced storage-related MTR shifts of up to 20 a.u., much more than the difference in intercept. Between cases, acquisition differences and differences in iron content affect MTR. Increased TR is known to result in MTR reductions (33), while strong WM iron depletion significantly increases MTR (22, 24, 25). More work is warranted to understand the dependency of MTR on the storage duration after formalin fixation.

Independently, non-zero regression intercepts between MTR and LFB, PLP and the other two MRI myelin measures indicate that MTR reflects not only myelin lipids and proteins but also other tissue characteristics, despite being positively correlated with high  $R^2$ . Although MTR is widely used to detect de- and remyelination (34), other non-aqueous tissue components, such as axonal and glial cell membranes, soluble proteins in the extracellular space, and astrocytic and axonal densities also play a role (35). Inflammation and edema further confound the specificity of MTR for myelin (35, 36), while MWF remains relatively unchanged (37, 38). Note the large overlap in MTR across different tissue types and the relatively high MTR in slowly expanding and inactive lesions, resulting

ence was statistically not significant ( $p = 0.987$ ). Significantly more BCAS1-positive cells were found in damaged DAWM compared to NAWM ( $p < 0.001$ ).

Per-case correlations and average correlation coefficients (data not shown) between the MRI metrics and stainings reflect the findings of [Figs. 4 and 5](#), i.e. strong correlations between myelin MRI metrics and myelin stainings, albeit with a non-zero intercept in correlations with MTR. Exemplarily, [Figure 6](#) presents the GraSE MWF vs. LFB correlations. Note that sections containing only NAWM or DAWM, i.e. no lesions, exhibited typically insignificant, flat correlations and that MWF and MTR values varied between cases.

Despite moderate to strong correlation coefficients across different tissue classes, within tissue class correlation coefficients were substantially smaller. To determine the extent to which LFB, PLP and TBB, in combination, predict the MRI metrics within specific tissue classes, we applied a linear mixed effects model. Data from all cases were included, and time since fixation was added as a fixed effect to account for differences in the MRI metrics related to storage time. [Table 2](#) summarizes the significant contributors that were determined in the regression model. BCAS1 data were not included in the mixed effects model as they were separately obtained and analyzed.

PLP significantly explained variations in NAWM and DAWM GraSE MWF, while CPMG MWF and MTR were strongly influenced by tissue storage time. TBB significantly



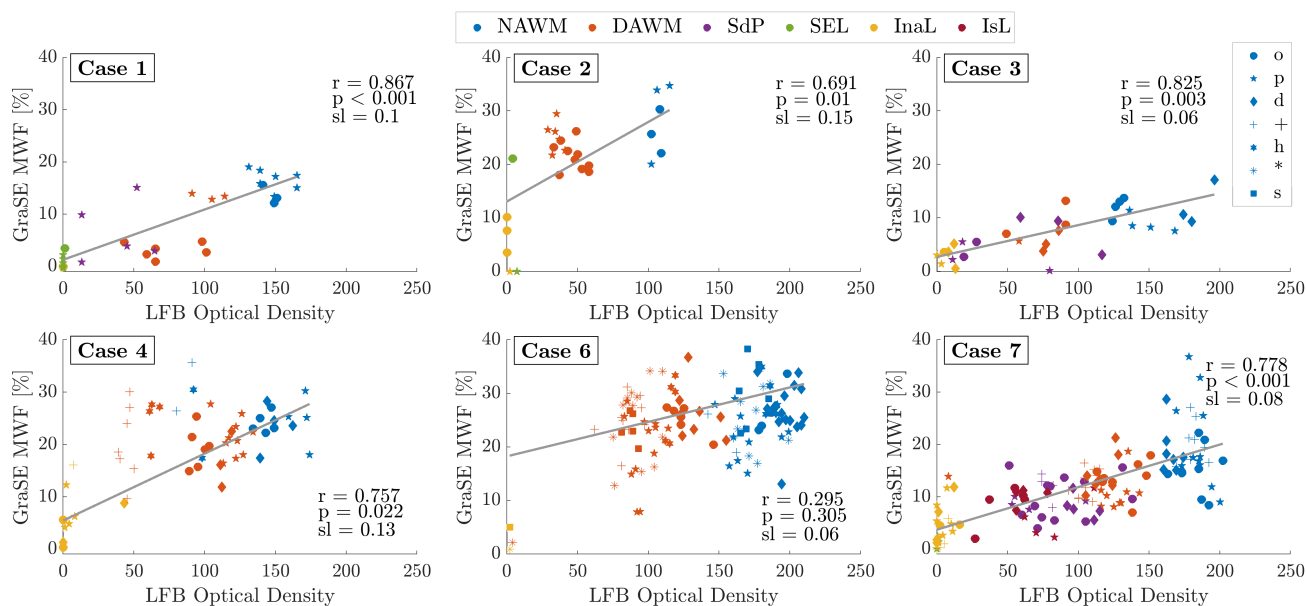

**Fig. 6. Within-case correlations between LFB and GraSE MWF across all ROIs.** In order to suppress between-section deviations, all correlations shown are weighted averages of the individual within-section correlations. Different symbols distinguish data from different sections of a case. Different colors indicate different ROI types. The slopes of the average correlations ranged from 0.06 to 0.15 % MWF per optical density unit. All correlations, except for Case 6, were significant. Case 5 is not shown as the GraSE data were deemed unreliable for analysis. (Acronyms: normal appearing WM (NAWM); diffusely abnormal WM (DAWM); inactive lesions (InaL); shadow plaques (SdP); slowly expanding lesions (SEL); ischemic lesions (IsL))

401 from the non-zero intercept.

402 Limitations of earlier MWI approaches (5, 16), i.e. small  
403 field-of-view and very long acquisition times, have been over-  
404 come by introducing the 3D GraSE sequence in MWI (15).  
405 However, the now widely used GraSE-MWI approach has never  
406 been histopathologically validated. Previous MWF histopatho-  
407 logical comparison focused on LFB intensities (8) and recently,

408 electron microscopy validated CPMG-MWI in rat spinal cord  
409 samples (9). We assessed myelin more broadly, including lipids  
410 as well as myelin proteins and iron to explain variations in  
411 MWF (28), with CD68 and BCAS1 for further validation.  
412 Gradient echoes in the GraSE sequence may make MWF more  
413 susceptible to static field inhomogeneities. However, in agree-  
414 ment with other work (24), we did not observe differences

**Table 2. Linear mixed effects model ANOVA predictors of MR myelin measurements.** Unadjusted p-values are reported together with their relative importance coefficients. Values reported in bold font are  $p < 0.05$ , non-bolded values reflect p-values between 0.05 and 0.1. If no significant factor was reported by the ANOVA (ns) or the largest  $\beta$ -coefficient did not correspond to the significant entry, the highest importance factor is listed in gray in the second half of the respective cell. (Acronyms: normal appearing WM (NAWM); diffusely abnormal WM (DAWM); inactive lesions (InaL); shadow plaques (SdP); slowly expanding lesions (SEL); ischemic lesions (IsL))

| Tissue Type | GraSE MWF                                                                                                                            | CPMG MWF                                                                                                      | MTR                                                                                                                                                                                                                                          |
|-------------|--------------------------------------------------------------------------------------------------------------------------------------|---------------------------------------------------------------------------------------------------------------|----------------------------------------------------------------------------------------------------------------------------------------------------------------------------------------------------------------------------------------------|
| <b>NAWM</b> | <b>PLP <math>p = 0.002</math> (<math>\beta = 0.543</math>)</b><br>TBB $p = 0.052$ ( $\beta = -0.198$ )                               | <b>Time <math>p = 0.010</math> (<math>\beta = 0.732</math>)</b>                                               | <b>Time <math>p = 0.020</math> (<math>\beta = -0.506</math>)</b>                                                                                                                                                                             |
| <b>DAWM</b> | <b>PLP <math>p &lt; 0.001</math> (<math>\beta = 0.534</math>)</b><br><b>TBB <math>p = 0.020</math> (<math>\beta = -0.227</math>)</b> | <b>Time <math>p &lt; 0.001</math> (<math>\beta = 0.857</math>)</b>                                            | <b>PLP <math>p &lt; 0.001</math> (<math>\beta = 0.233</math>)</b><br><b>LFB <math>p = 0.003</math> (<math>\beta = 0.174</math>)</b><br><b>TBB <math>p = 0.016</math> (<math>\beta = -0.132</math>)</b><br>Time $p = ns$ ( $\beta = -0.346$ ) |
| <b>SdP</b>  | PLP $p = 0.062$ ( $\beta = 0.582$ )<br>Time $p = 0.070$ ( $\beta = -0.409$ )                                                         | Time $p = ns$ ( $\beta = 0.148$ )<br>TBB $p = ns$ ( $\beta = -1.076$ )                                        | LFB $p = 0.059$ ( $\beta = 0.192$ )                                                                                                                                                                                                          |
| <b>SEL</b>  | PLP $p = ns$ ( $\beta = 0.511$ )                                                                                                     | PLP $p = 0.091$ ( $\beta = 0.408$ )<br>LFB $p = ns$ ( $\beta = -2.650$ )<br>Time $p = ns$ ( $\beta = 2.656$ ) | <b>LFB <math>p &lt; 0.001</math> (<math>\beta = 0.489</math>)</b>                                                                                                                                                                            |
| <b>InaL</b> | LFB $p = 0.084$ ( $\beta = 0.255$ )                                                                                                  | LFB $p = 0.063$ ( $\beta = 0.544$ )<br>Time $p = ns$ ( $\beta = 0.890$ )                                      | <b>Time <math>p = 0.002</math> (<math>\beta = -0.626</math>)</b><br><b>Time <math>p = 0.002</math> (<math>\beta = -0.626</math>)</b>                                                                                                         |
| <b>IsL</b>  | TBB $p = ns$ ( $\beta = 0.423$ )                                                                                                     |                                                                                                               | PLP $p = ns$ ( $\beta = 0.587$ )                                                                                                                                                                                                             |

415 between GraSE and CPMG MWF, although TBB contributed  
416 to the prediction of GraSE MWF in some regions (Table 2).  
417 Note that iron was highly variable between cases in the present  
418 study, possibly due to reduced tissue iron concentrations in  
419 progressive cases with long disease duration (22).

420 Relative differences in MWF between tissues agreed well  
421 with the differences in LFB and PLP stainings, including in  
422 lesions. This demonstrates excellent sensitivity of MRI-based  
423 myelin imaging to the detection of different stages or degrees of  
424 de- or remyelination, despite low lesional myelin concentrations.  
425 Integrating the different stainings in a multi-linear regression  
426 showed that both myelin lipid and protein concentrations are  
427 needed to predict variations within tissue classes, such as  
428 within DAWM or between different shadow plaques. Notably,  
429 LFB and PLP explained much greater variation in MWF than  
430 TBB.

431 **Slowly Expanding and Inactive Lesions.** Differently from  
432 slowly expanding lesions (39), inactive lesions do not have  
433 a rim of degradation products, but both are typically de-  
434 scribed as relatively free of myelin containing macrophages,  
435 microglial activation, and inflammation in their lesion centers  
436 (40). By contrast, we observed non-zero MWF and MTR in  
437 inactive lesions and found few, thin myelin sheaths in LFB  
438 sections, not seen in slowly expanding lesions (Figure 3). LFB  
439 and both MWF and MTR showed consistently higher levels  
440 in inactive compared to slowly expanding lesions. Correspond-  
441 ingly, the statistical model detected, albeit insignificantly, that  
442 LFB influenced GraSE and CPMG MWF for inactive, but not  
443 for slowly expanding lesions.

444 Our findings are in line with post-mortem work showing in-  
445 significantly higher MTR and macromolecular proton fractions  
446 in inactive compared to slowly expanding lesions (35). More-  
447 over, in vivo susceptibility and myelin imaging demonstrated  
448 that rim lesions have lower myelin values than inactive lesions  
449 (41). Most of these studies attributed the lower signal to the  
450 greater destructiveness of slowly enhancing lesions. Meanwhile,  
451 it has been shown that both slowly expanding and inactive  
452 lesions may contain BCAS1+ premyelinating oligodendrocytes,  
453 indicating the ability of both lesion types to remyelinate (19).  
454 It is believed that while the rim of activated microglia and  
455 macrophages exists, it may prevent lesional myelin recovery  
456 (39, 42). Our data suggest that inactive lesions, for which the  
457 rim has resolved, start to recover some thin myelin sheaths to  
458 a degree that the lipid signal can be detected on histological  
459 stainings and with myelin-sensitive MRI techniques.

460 Thus, it may be possible to capture varying degrees of  
461 late remyelination also in vivo using MRI. All these observa-  
462 tions warrant further investigation to better characterize the  
463 difference between slowly expanding and inactive lesions.

464 Notably, our data showed that BCAS1+ also stains de-  
465 generating glial cells. This is supported by the BCAS1+ cell  
466 morphology in areas of DAWM and periplaque WM, where  
467 cells had either no or short and twisted dystrophic processes.  
468 By contrast, in few areas within inactive or partly remyeli-  
469 nated lesions many BCAS1+ cells had extensive branches and  
470 formed processes to multiple internodes, yielding a morphology  
471 reminiscent of that described for PLP-positive myelinating  
472 oligodendrocytes (43). However, this was only found in few  
473 lesions and might relate to the transient nature of remyeli-  
474 nation.

**Normal appearing and diffusely abnormal WM & Shadow**  
**Plaques and Ischemic Lesions.** The lower LFB but similar  
PLP signal between DAWM and NAWM (Figure 5) agrees  
with the lipid abnormality characteristic of DAWM (28). Inter-  
estingly, our mixed effects model suggested that more subtle  
differences within NAWM and DAWM GraSE MWF relate  
to differing PLP-concentrations. TBB also played a role in  
distinguishing subtle differences between NAWM and DAWM  
regions, in line with the importance of iron for myelin pro-  
duction in oligodendrocytes and previously described iron loss  
in DAWM (44). Given the widespread diffuse injury, NAWM  
ROIs were confined to subcortical regions. These tissue block  
areas are more likely to be affected by misregistration errors,  
possibly explaining why the MRI-measured NAWM-DAWM  
difference was smaller than expected from their LFB intensi-  
ties. CPMG and MTR were predominantly related to storage  
time or a combination of predicting factors.

Shadow plaques and ischemic lesions were well reflected in  
GraSE MWF, but both lesion types had higher MTR than  
NAWM and DAWM. This may again relate to the inverse  
relationship between MTR and iron concentrations (23, 25).  
Note that our shadow plaques yielded non-zero TBB staining,  
although they have been generally found to remyelinate with-  
out iron recovery (22). Regardless, myelin-related regression  
coefficients for GraSE MWF in shadow plaques were noticeably  
larger than the TBB coefficients, indicating that iron plays a  
minor role in the estimation of MWF in shadow plaques. No  
specific histopathological factor predicted MWF or MTR of  
ischemic lesions.

**Study strengths and limitations.** We tested how myelin lipids,  
proteins and iron contribute to MWF and MTR. Our data  
provide the first validation of the use of the GraSE sequence  
for MWI. We demonstrated the sensitivity of these myelin  
imaging techniques on a case-by-case basis. Across cases,  
we utilized mixed effects modeling to provide a combined  
assessment of the role of lipids, proteins, and iron to the MRI  
measures, rather than assessing them in isolation. We did not  
consider axonal density, which is relevant for MTR (35), due  
to its strong collinearity with myelin. Assessing gliosis and  
inflammation, however, may help to shed further light on the  
observed lesional differences. BCAS1 staining was performed  
separately to support our initial findings. Dedicated sample  
selection to investigate specific tissue classes or class differences  
would be advantageous but was beyond the scope of the work  
presented here.

Our investigation included MTR (6), rather than quantita-  
tive magnetization transfer (35), as MTR is more frequently  
used, both in clinical trials and research. Assessing other  
techniques, e.g.  $T_2^*$ -based myelin mapping (7, 45), may be of  
interest in the future. Although other MRI techniques may  
have advantages over traditional MWI acquisitions, including  
potentially faster acquisition times (6), higher spatial reso-  
lution (46), improved signal-to-noise ratio and lower specific  
absorption rates, they are also known to be influenced by  
axonal water (12), magnetization transfer effects (11, 36, 47)  
or to suffer phase errors due to field inhomogeneities and phys-  
iological noise (48, 49). Current MWI approaches (14, 21) also  
have the advantage of being model-free, and new developments  
in MWI may alleviate limitations in scan time and spatial  
resolution (50).



## 535 Conclusions

536 Both MWI strategies, the original CPMG and the faster  
537 GraSE acquisition, as well as MTR reflected the histologically  
538 assessed myelin concentrations across tissues and allowed to  
539 detect subtle within-tissue class differences. Notably, the  
540 range of MWF and MTR values observed in inactive lesions  
541 appeared to reflect variable degrees of late, slowly progressing  
542 remyelination.

543  
544 **Data Availability Statement:** Data are available from the  
545 corresponding author upon reasonable request.

546 **ACKNOWLEDGMENTS.** The authors wish to thank Marianne  
547 Leisser for supporting the histological analysis at the Medical Uni-  
548 versity of Vienna, and Professor Hans Lassmann for allowing them  
549 to use tissue from the multiple sclerosis brain bank for this work.  
550 We wish to acknowledge the continued research support by Philips  
551 Healthcare. This study was supported by the Research Method-  
552 ology Grant from the BC Children's Hospital Research Institute  
553 (former CFRI) and funding from the National Multiple Sclerosis  
554 Society (RG-1507-05301). VW was supported by a graduate student  
555 award from the Multiple Sclerosis Society of Canada (EGID  
556 2002). VE was supported by funding from the National Multiple  
557 Sclerosis Society (RG-1507-05301). EHT was supported by Consejo  
558 Nacional de Ciencia y Tecnología (237961). We are grateful for  
559 additional support from NSERC (402039-2011, 2016-05371), CIHR  
560 (RN382474-418628) and the Milan and Maureen Ilich Foundation.  
561 AR is supported by Canada Research Chairs (950-230363).

## 562 References

563 1. Goldschmidt T., Antel J., König F.B., Brück W., and Kuhlmann T. Remyelination capacity of  
564 the MS brain decreases with disease chronicity. *Neurology*, 72(22): 1914–1921, 2009.  
565 2. Patrikios P., Stadelmann C., Kutzelnigg C., Rauschka H., Schmidbauer M., Laursen H.,  
566 Sorensen P.S., Brück W., Lucchinetti C., and Lassmann H. Remyelination is extensive in  
567 a subset of multiple sclerosis patients. *Brain*, 129(12): 3165–3172, 2006.  
568 3. Stankoff B., Jadasz J.J., Hartung H.P., Kuery P., Zalc B., and Lubetzki C. Repair strategies  
569 for multiple sclerosis: challenges, achievements and perspectives. *Curr Opin Neurol*, 29(3):  
570 286–292, 2016.  
571 4. Oh J., Ontaneda D., Azevedo C., Klawiter E.C., Absinta M., Arnold D.L., Bakshi R., Calabresi  
572 P.A., Crainiceanu C., Dewey B., and Freeman L. Imaging outcome measures of neuroprotection  
573 and repair in MS: A consensus statement from NAIMS. *Neurology*, 92: 519–533, 2019.  
574 5. MacKay A., Whittall K., Adler J., Li D., Paty D., and Graeb D. In vivo visualization of myelin  
575 water in brain by magnetic resonance. *Magn Res Med*, 31:673–677, 1994.  
576 6. Nguyen T.D., Wisniewski C., Cooper M.A., Kumar D., Raj A., Spincemaille P., Wang Y., Vartanian  
577 T., and Gauthier S.A. T2prep three-dimensional spiral imaging with efficient whole brain  
578 coverage for myelin water quantification at 1.5 tesla. *Magn Reson Med*, 67(3): 614–621,  
579 2012.  
580 7. Alonso-Ortiz E., Levesque I.R., and Pike G.B. MRI-based myelin water imaging: A technical  
581 review. *Magn Reson Med*, 73(1): 70–81, 2015.  
582 8. Laule C., Leung E., Li D.K.B., and et al. Myelin water imaging in multiple sclerosis: quantita-  
583 tive correlations with histopathology. *Mult Scler*, 12(6):747–753, 2006.  
584 9. Chen H.S.-M., Holmes N., Liu J., Tetzlaff W., and Kozlowski P. Validating myelin water imaging  
585 with transmission electron microscopy in a rat spinal cord injury model. *NeuroImage*, 153:  
586 122–130, 2017.  
587 10. Schmierer K., Scaravilli F., Altmann D.R., Barker G.J., and Miller D.H. Magnetization transfer  
588 ratio and myelin in postmortem multiple sclerosis brain. *Ann Neurol*, 56: 407–415, 2004.  
589 11. Zhang J., Kolind S.H., Laule C., and MacKay A.L. How does magnetization transfer influence  
590 mcDESPOt results? *Magn Reson Med*, 74(5): 1327–1335, 2015.  
591 12. Chang E.H., Argyelan M., Aggarwal M., and et al. The role of myelination in measures of  
592 white matter integrity: Combination of diffusion tensor imaging and two-photon microscopy of  
593 CLARITY intact brains. *NeuroImage*, 147:253–261, 2017.  
594 13. Pareto D., Garcia-Vidal A., Alberich M., and et al. Ratio of t1-weighted to t2-weighted signal  
595 intensity as a measure of tissue integrity: Comparison with magnetization transfer ratio in  
596 patients with multiple sclerosis. *Am J Neuroradiol*, 41(3):461–463, 2020.  
597 14. Whittall K.P., MacKay A.L., Graeb D.A., Nugent R.A., Li D.K., and Paty D.W. In vivo mea-  
598 surements of T2 distributions and water contents in normal human brain. *Magn Reson Med*,  
599 37(1): 34–43, 1997.  
600 15. Prasloski T., Rauscher A., MacKay A.L., Hodgson M., Vavasour I.M., Laule C., and Mädler  
601 B. Rapid whole cerebrum myelin water imaging using a 3D GRASE sequence. *NeuroImage*,  
602 63:533–539, 2012.  
603 16. Kolind S.H., Mädler B., Fischer S., Li D.K.B., and MacKay A.L. Myelin water imaging: im-  
604 plementation and development at 3.0T and comparison to 1.5T measurements. *Magn Reson  
605 Med*, 62(1):106–115, 2009.  
606 17. Mädler B. and MacKay A.L. In-vivo 3D multi-component T2-relaxation measurements for  
607 quantitative myelin imaging at 3T. In *Proc Intl Soc Mag Reson Med 14*, page 2112, 2006.

608 18. Finelli D.A., Hurst G.C., Amantia P. Jr., and et al. Cerebral white matter: Technical develop-  
609 ment and clinical applications of effective magnetization transfer (mt) power concepts for  
610 high-power, thin-section, quantitative mt examinations. *Radiology*, 199:219–226, 1996.  
611 19. Fard M.K., van der Meer F., Sánchez P., Cantuti-Castelvetri L., Mandat S., Jäkel S., For-  
612 nasiero E.F., Schmitt S., Ehrlich M., Starost L., and Kuhlmann T. BCAS1 expression defines  
613 a population of early myelinating oligodendrocytes in multiple sclerosis lesions. *Sci Transl  
614 Med*, 9(419): eaam7816, 2017.  
615 20. Wiggemann V., Vavasour I.M., Kolind S.H., MacKay A.L., Helms G., and Rauscher A. Non-  
616 negative least squares computation for in vivo myelin mapping using simulated multi-echo  
617 spin-echo T2 decay data. *NMR Biomed*, page e4277, 2020.  
618 21. Prasloski T., Mädler B., Xiang Q.-S., MacKay A., and Jones C. Applications of stimulated  
619 echo correction to multicomponent T2 analysis. *Magn Reson Med*, 67(6):1803–1814, 2012.  
620 22. Hametner S., Wimmer I., Haider L., Pfeifenbring S., Brück W., and Lassmann H. Iron and  
621 neurodegeneration in the multiple sclerosis brain. *Ann Neurol*, 74(6): 848–861, 2013.  
622 23. Langkammer C., Krebs N., Goessler W., Scheurer R., Yen K., Fazekas F., and Ropele S.  
623 Susceptibility induced gray–white matter MRI contrast in the human brain. *NeuroImage*, 59(2):  
624 1413–1419, 2012.  
625 24. Birkel C., Birkel-Toegelhofer A.M., Endmayr V., and et al. The influence of brain iron on myelin  
626 water imaging. *NeuroImage*, 199:545–552, 2019.  
627 25. Birkel C., Birkel-Toegelhofer A.M., Kames C., and et al. The influence of iron oxidative state on  
628 quantitative MRI parameters in post mortem human brain. *NeuroImage*, 220:117080, 2020.  
629 26. Jenkinson M., Bannister P., Brady M., and Smith S. Improved optimisation for the robust  
630 and accurate linear registration and motion correction of brain images. *NeuroImage*, 17(2):  
631 825–841, 2002.  
632 27. Modat M., Cash D.M., Daga P., Winston G.P., Duncan J.S., and Ourselin S. Global image  
633 registration using a symmetric block-matching approach. *J Med Imaging*, 1(2):024003, 2014.  
634 28. Laule C., Pavlova V., Leung E., Zhao G., MacKay A.L., Kozlowski P., Traboulsee A.L., Li D.K.,  
635 and Moore G.W. Diffusely abnormal white matter in multiple sclerosis: further histologic stud-  
636 ies provide evidence for a primary lipid abnormality with neurodegeneration. *J Neuropathol  
637 Exp Neurol*, 72(1): 42–52, 2013.  
638 29. Vittinghoff E., Glidden D.V., Shiboski S.C., and McCulloch C.E. *Regression methods in bio-  
639 statistics: linear, logistic, survival, and repeated measures models*. Springer Science & Busi-  
640 ness Media, 2011.  
641 30. Lin D., Foster D.P., and Ungar L.H. VIF-Regression: A fast regression algorithm for large data.  
642 *J Am Stat Assoc*, 106(493): 232–247, 2011.  
643 31. Schmierer K., Wheeler-Kingshott C.A.M., Tozer D.J., Boulby P.A., Parkes H.G. abd  
644 Yousry T.A., Scaravilli F. and Barker G.J., Tofts P.S., and Miller D.H. Quantitative magnetic  
645 resonance of post-mortem multiple sclerosis brain before and after fixation. *Magn Reson  
646 Med*, 59(2): 268–277, 2008.  
647 32. Ward K.M. and Balaban R.S. Determination of pH using water protons and chemical ex-  
648 change dependent saturation transfer (CEST). *Magn Reson Med*, 44(5): 799–802, 2000.  
649 33. Helms G., Dathe H., and Dechent P. Modeling the influence of TR and excitation flip angle  
650 on the magnetization transfer ratio (MTR) in human brain obtained from 3D spoiled gradient  
651 echo MRI. *Magn Reson Med*, 64(1): 177–185, 2010.  
652 34. Chen J.T., Kuhlmann T., Jansen G.H., Collins D.L., Atkins H.L., Freedman M.S., O'Connor  
653 P.W., Arnold D.L., and Canadian MS/BMT Study Group. Voxel-based analysis of the evolution  
654 of magnetization transfer ratio to quantify remyelination and demyelination with histopatholog-  
655 ical validation in a multiple sclerosis lesion. *NeuroImage*, 36(4): 1152–1158, 2007.  
656 35. Schmierer K., Tozer D.J., Scaravilli F., Altmann D.R., Barker G.J., Tofts P.S., and Miller D.H.  
657 Quantitative magnetization transfer imaging in postmortem multiple sclerosis brain. *J Magn  
658 Reson Imag*, 26(1): 41–51, 2007.  
659 36. Vavasour I.M., Laule C., Li D.K.B., Traboulsee A.L., and MacKay A.L. Is the magnetization  
660 transfer ratio a marker for myelin in multiple sclerosis? *J Magn Reson Imaging*, 33(3):710–  
661 718, 2011.  
662 37. Gareau P.J., Rutt B.K., Karlik S.J., and Mitchell J.R. Magnetization transfer and multicom-  
663 ponent T2 relaxation measurements with histopathologic correlation in an experimental model  
664 of MS. *J Magn Reson Imaging*, 11(6): 586–595, 2000.  
665 38. Vavasour I.M., Chang K.L., Combes A.J.E., and et al. Water content changes in new multiple  
666 sclerosis lesions have a minimal effect on the determination of myelin water fraction values.  
667 *J Neuroimaging*, 31(6):1119–1125, 2021.  
668 39. Dal-Bianco A., Grabner G., Kronnenwetter C., Weber M., Höftberger R., Berger T., Auff E.,  
669 Leutmezer F., Trattnig S., Lassmann H., and Bagnato F. Slow expansion of multiple sclerosis  
670 iron rim lesions: Pathology and 7T magnetic resonance imaging. *Acta Neuropathol*, 133(1):  
671 25–42, 2017.  
672 40. Kornek B., Storch M.K., Weissert R., Wallstroem E., Steffler A., Olsson T., Linington  
673 C., Schmidbauer M., and Lassmann H. Multiple sclerosis and chronic autoimmune en-  
674 cephalomyelitis: A comparative quantitative study of axonal injury in active, inactive, and  
675 remyelinated lesions. *Am J Pathol*, 157(1): 267–276, 2000.  
676 41. Yao T., Nguyen T.D., Pandya S., Zhang Y., Rúa S.H., Kovanilkaya I., Kuceyeski A., Liu Z.,  
677 and Wang Y. Combining quantitative susceptibility mapping with automatic zero reference  
678 (QSMO) and myelin water fraction imaging to quantify iron-related myelin damage in chronic  
679 active MS lesions. *AJNR Am J Neuroradiol*, 39(2): 303–310, 2018.  
680 42. Absinta M., Sati P., and Reich D.S. Persistent 7-tesla phase rim predicts poor outcome in  
681 new multiple sclerosis patient lesions. *J Clin Invest*, 126(7): 2597–2609, 2016.  
682 43. Chang A., Staugaitis S.M., Dutta R., Batt C.E., Easley K.E., Chomyk A.M., Yong V.W., Fox  
683 R.J., Kidd G.J., and Trapp B.D. Cortical remyelination: A new target for repair therapies in  
684 multiple sclerosis. *Ann Neurol*, 72(6): 918–926, 2012.  
685 44. Bagnato F., Hametner S., Boyd E., Endmayr V., Shi Y., Ikonomidou V., Chen G., Pawate S.,  
686 Lassmann H., Smith S., and Welch E.B. Unentangling the R2\* contrast in multiple sclerosis:  
687 a combined MRI-histology study at 7.0 Tesla. *PLoS One*, 13(3): e0193839, 2018.  
688 45. Lee J., Nam Y., Choi J.Y., Kim E.Y., Oh S.H., and Kim D.H. Mechanisms of T2\* anisotropy  
689 and gradient echo myelin water imaging. *NMR Biomed*, 30: e3513, 2017.  
690 46. Ouellette R., Mangeat G., Polyak I., and et al. Validation of rapid magnetic resonance myelin  
691 imaging in multiple sclerosis. *Ann Neurol*, 87(5):710–724, 2020.

- 692 47. West D.J., Teixeira R.P.A.G., Wood T.C., Hajnal J.V., Tournier J.D., and Malik S.J. Inherent  
693 and unpredictable bias in multi-component DESPOT myelin water fraction estimation. *Neu-*  
694 *rolmage*, 195: 78–88, 2019.
- 695 48. Nam Y., Kim D.H., and Lee J. Physiological noise compensation in gradient-echo myelin  
696 water imaging. *NeuroImage*, 120: 345–349, 2015.
- 697 49. Alonso-Ortiz E., Levesque I.R., Paquin R., and Pike G.B. Field inhomogeneity correction for  
698 gradient echo myelin water fraction imaging. *Magn Reson Med*, 78(1): 49–57, 2017.
- 699 50. Dvorak A.V., Wiggermann V., Gilbert G., and et al. Multispin echo T2 relaxation imaging with  
700 compressed sensing (METRICS) for rapid myelin water imaging. *Magn Reson Med*, 84(3):  
701 1264–1279, 2020.
